# Supplementary material
Source: publisher figshare collection journal article supplement (https://tandf.figshare.com/articles/dataset/_/23647007)

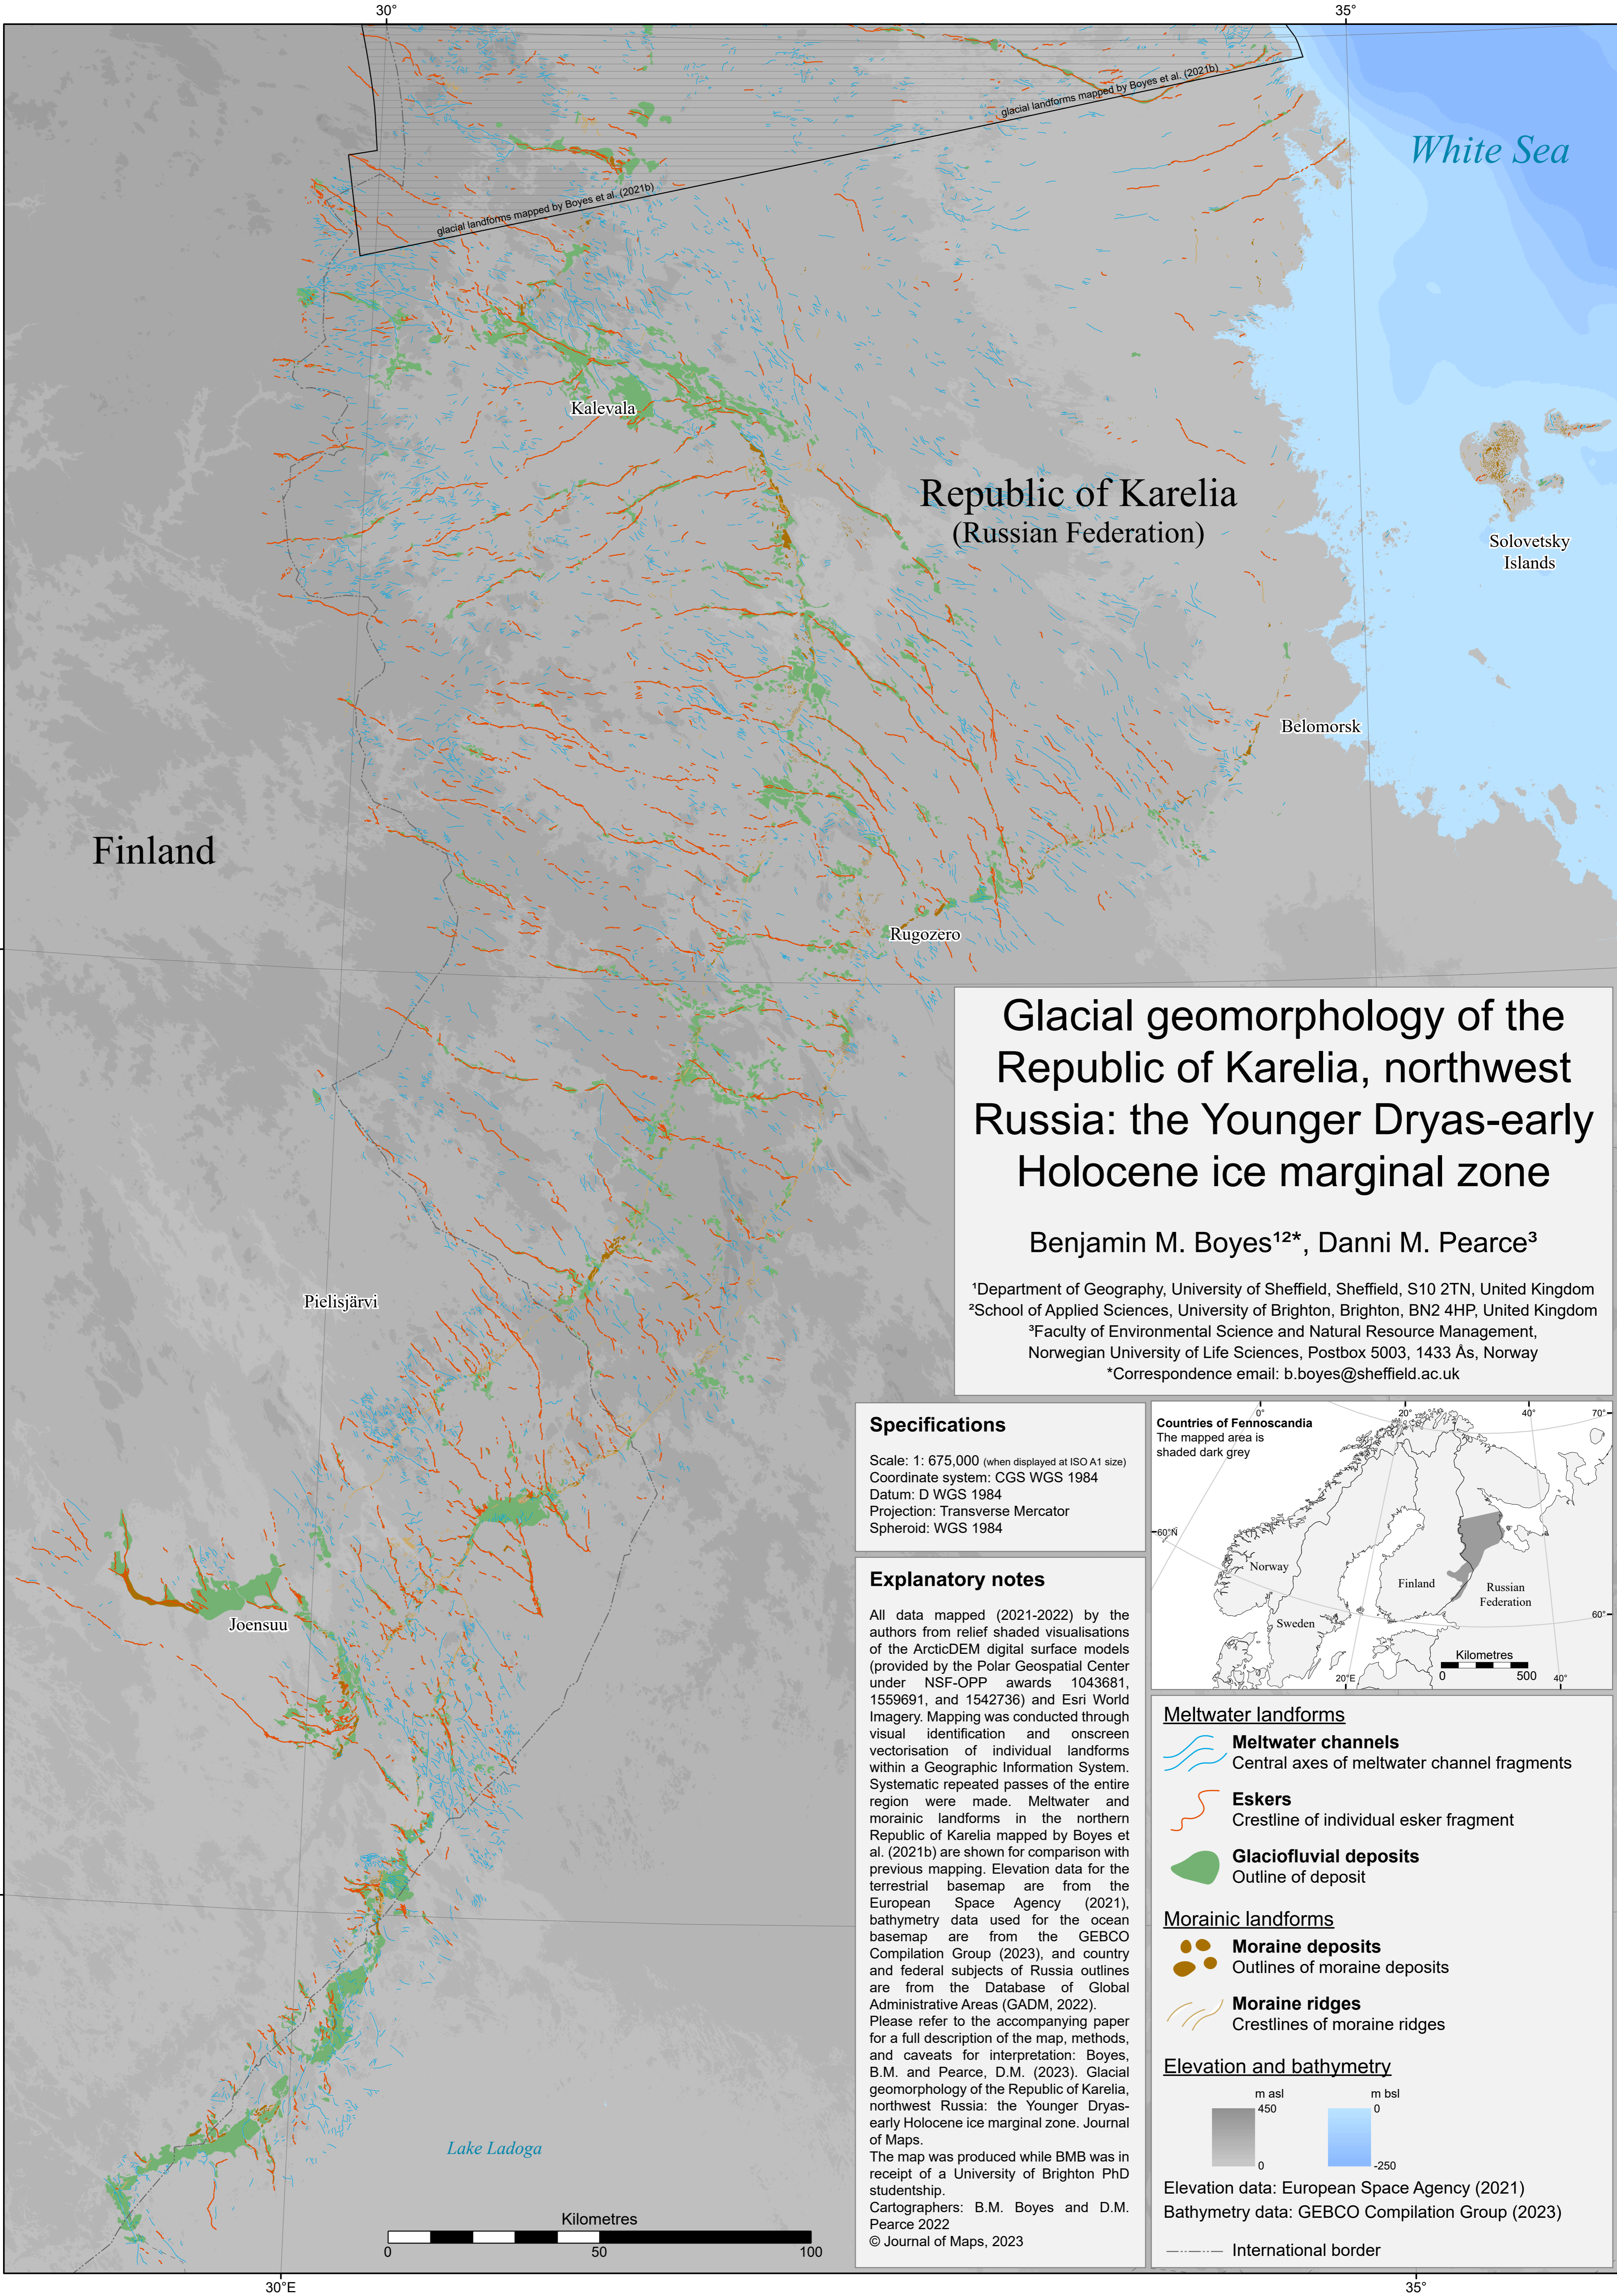

# Republic of Karelia (Russian Federation)

## Glacial geomorphology of the Republic of Karelia, northwest Russia: the Younger Dryas-early Holocene ice marginal zone

Benjamin M. Boyes<sup>12\*</sup>, Danni M. Pearce<sup>3</sup>

<sup>1</sup>Department of Geography, University of Sheffield, Sheffield, S10 2TN, United Kingdom

<sup>2</sup>School of Applied Sciences, University of Brighton, Brighton, BN2 4HP, United Kingdom

<sup>3</sup>Faculty of Environmental Science and Natural Resource Management,  
Norwegian University of Life Sciences, Postbox 5003, 1433 Ås, Norway

\*Correspondence email: b.boyes@sheffield.ac.uk

### Specifications

Scale: 1: 675,000 (when displayed at ISO A1 size)  
Coordinate system: CGS WGS 1984  
Datum: D WGS 1984  
Projection: Transverse Mercator  
Spheroid: WGS 1984

### Explanatory notes

All data mapped (2021-2022) by the authors from relief shaded visualisations of the ArcticDEM digital surface models (provided by the Polar Geospatial Center under NSF-OPP awards 1043681, 1559691, and 1542736) and Esri World Imagery. Mapping was conducted through visual identification and onscreen vectorisation of individual landforms within a Geographic Information System. Systematic repeated passes of the entire region were made. Meltwater and morainic landforms in the northern Republic of Karelia mapped by Boyes et al. (2021b) are shown for comparison with previous mapping. Elevation data for the terrestrial basemap are from the European Space Agency (2021), bathymetry data used for the ocean basemap are from the GEBCO Compilation Group (2023), and country and federal subjects of Russia outlines are from the Database of Global Administrative Areas (GADM, 2022). Please refer to the accompanying paper for a full description of the map, methods, and caveats for interpretation: Boyes, B.M. and Pearce, D.M. (2023). Glacial geomorphology of the Republic of Karelia, northwest Russia: the Younger Dryas-early Holocene ice marginal zone. *Journal of Maps*. The map was produced while BMB was in receipt of a University of Brighton PhD studentship. Cartographers: B.M. Boyes and D.M. Pearce 2022  
© Journal of Maps, 2023

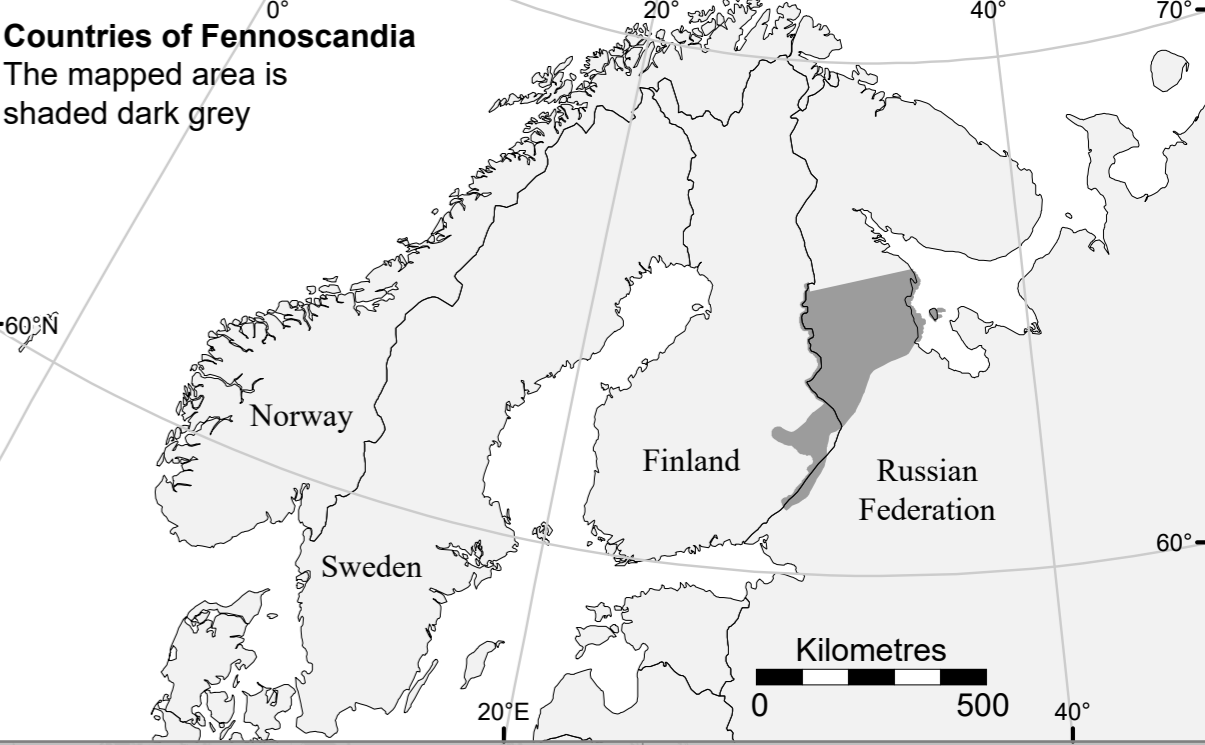

### Meltwater landforms

- Meltwater channels**  
Central axes of meltwater channel fragments
- Eskers**  
Crestline of individual esker fragment
- Glaciofluvial deposits**  
Outline of deposit

### Morainic landforms

- Moraine deposits**  
Outlines of moraine deposits
- Moraine ridges**  
Crestlines of moraine ridges

### Elevation and bathymetry

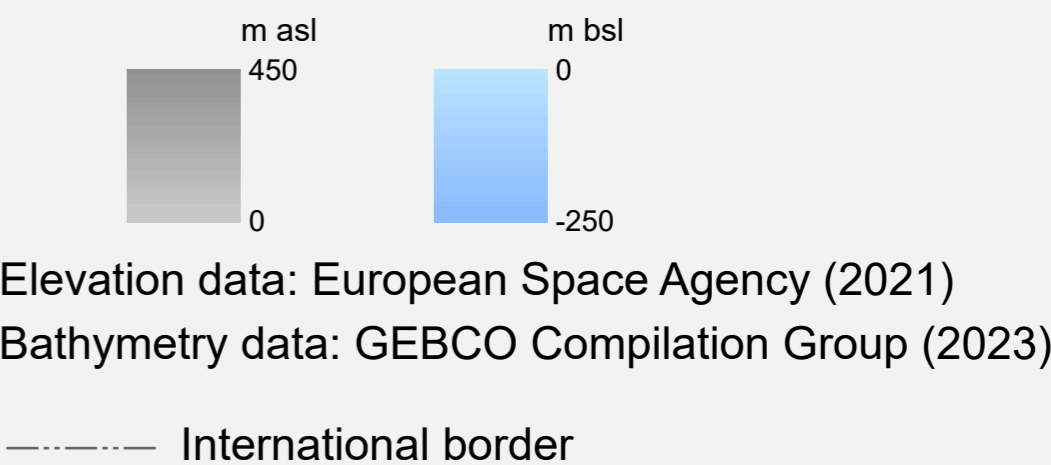

Supplement: Supplementary file 1 [file 1 › tjom_a_2230999_sm3072.pdf]
