# Supplementary material
Source: publisher figshare collection journal article supplement (https://tandf.figshare.com/articles/dataset/_/23647007)
Supplement: Supplementary file 1 [file 1]

Archive with 2 entries (2 files):
- tjom_a_2230999_sm4746.docx
- tjom_a_2230999_sm3072.pdf
