# Supplementary material
Source: publisher figshare collection journal article supplement (https://tandf.figshare.com/articles/dataset/_/23647007)
Supplement: Supplementary file 1 [file 1 › tjom_a_2230999_sm4746.docx]

**Map design**

This map has been designed in the same manner as Boyes et al. (2021) *Glacial geomorphology of the Kola Peninsula and Russian Lapland* (Journal of Maps, 17/2) so that the two maps can be viewed alongside and compared.

This map is projected in WGS 1984 UTM Zone 36N and is designed to be printed on A1 paper at 1: 675,000 to ensure all the detail is visible. Any less than A1 and the meltwater channels, for example, merge into one unit. In addition, the shapefile data used in the production of this map is provided as supplementary information to allow site-specific viewing of the mapped landforms. The Main Map has used the CopernicusDEM elevation and GEBCO bathymetry data for the background to provide the reader with an idea of the underlying topography which should compliment the geomorphology. Place names of administrative centres and major contemporary water bodies are included to aid locating the features shown on the map. All identified glacial landforms were mapped and thus included in this map; the symbology used copies Boyes et al. (2021) *Glacial geomorphology of the Kola Peninsula and Russian Lapland* so that the two maps can be viewed alongside and compared.
